# Supplementary material for: Synthesis and reactivity of a 4His enzyme model complex
Source: Royal Society of Chemistry journal article supplement (doi:10.1039/c7ra09456f), 2017-01-01
Supplement: c7ra09456f1.pdf [file c7ra09456f1.pdf]

## **Synthesis and reactivity of a 4His enzyme model complex**

**Jia Li,<sup>a</sup> Atanu Banerjee,<sup>a</sup> Timothy A. Hasse,<sup>a</sup> Reza Loloee,<sup>b</sup> Shannon M. Biros,<sup>c</sup> Richard J. Staples,<sup>c</sup> and Ferman A. Chavez<sup>\*,a</sup>**

<sup>a</sup>Department of Chemistry, Oakland University, Rochester, MI 48309, USA

E-mail: [chavez@oakland.edu](mailto:chavez@oakland.edu), Ph: (248) 370-4092

<sup>b</sup>Department of Physics and Astronomy, Michigan State University, East Lansing, MI 48824, USA

<sup>c</sup>Department of Chemistry, Michigan State University, East Lansing, MI 48824, USA

# Structural Data

Date: August 25, 2017

Submitter: Ferman Chavez

Sample Reference Number: Fe(TrIm)<sub>4</sub>(OTf)<sub>2</sub>

X-ray Number: CF316a

Center for Crystallographic Research  
Michigan State University  
Department of Chemistry  
East Lansing, MI 48824  
**Dr. Richard J. Staples**  
staples@chemistry.msu.edu  
(Shannon M. Biros, PhD)

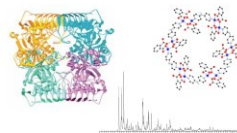

## Introduction:

Single crystal study to confirm the identity of the sample submitted. One molecule of diethyl ether is also present in the asymmetric unit (not shown).

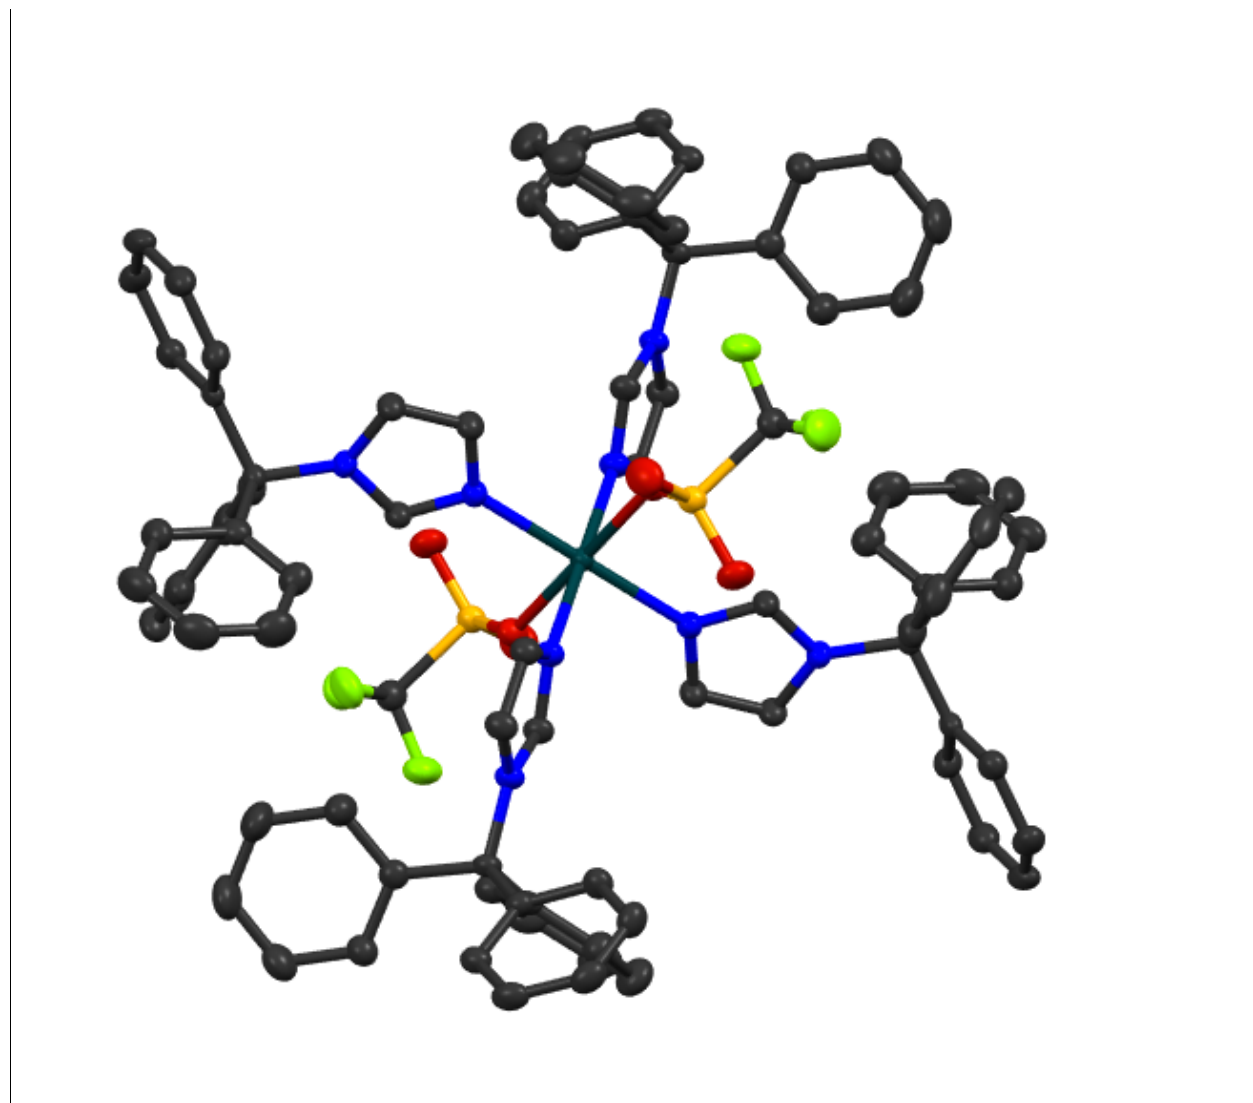

## Experimental Section:

A colorless prism crystal with dimensions 0.224 x 0.185 x 0.064 mm was mounted on a Nylon loop using very small amount of paratone oil.

Data were collected using a Bruker CCD (charge coupled device) based diffractometer equipped with an Oxford Cryostream low-temperature apparatus operating at 173 K. Data were measured using omega and phi scans of 0.5° per frame for 10 s. The total number of images was based on results from the program COSMO<sup>1</sup> where redundancy was expected to be 4.0 and completeness of 100% out to 0.83 Å. Cell parameters were retrieved using APEX II software<sup>2</sup> and refined using SAINT on all observed reflections. Data reduction was performed using the SAINT software,<sup>3</sup> which corrects for Lp. Scaling and absorption corrections were applied using SADABS<sup>4</sup> multi-scan technique, supplied by George Sheldrick. The structures are solved by the direct method using the SHELXS-97 program and refined by least squares method on F<sup>2</sup>, SHELXL-2014<sup>5</sup>, which are incorporated in OLEX2.<sup>6</sup>

The structure was solved in the space group P $\bar{1}$  (# 2). All non-hydrogen atoms are refined anisotropically. Hydrogen atoms were calculated by geometrical methods and refined as a riding model. The crystal used for the diffraction study showed no decomposition during data collection. All drawings are done at 50% ellipsoids.

**Acknowledgement.** The CCD based x-ray diffractometer at Michigan State University were upgraded and/or replaced by departmental funds.

## References

1. COSMO V1.61, *Software for the CCD Detector Systems for Determining Data Collection Parameters*. Bruker Analytical X-ray Systems, Madison, WI (2009).
2. APEX2 V2010.11-3. *Software for the CCD Detector System*; Bruker Analytical X-ray Systems, Madison, WI (2010).
3. SAINT V 7.68A *Software for the Integration of CCD Detector System* Bruker Analytical X-ray Systems, Madison, WI (2010).
4. SADABS V2.008/2 Program for absorption corrections using Bruker-AXS CCD based on the method of Robert Blessing; Blessing, R.H. *Acta Cryst.* A51, 1995, 33-38.
5. Sheldrick, G.M. "A short history of SHELX". *Acta Cryst.* A64, 2008, 112-122.
6. O. V. Dolomanov, L. J. Bourhis, R. J. Gildea, J. A. K. Howard and H. Puschmann, OLEX2: a complete structure solution, refinement and analysis program. *J. Appl. Cryst.* (2009). 42, 339-341.

<sup>a</sup> Obtained with graphite monochromated Mo K $\alpha$  ( $\lambda = 0.71073 \text{ \AA}$ ) radiation.

$$^b R_1 = \sum \left| |F_o| - |F_c| \right| / \sum |F_o| \quad ^c wR_2 = \left\{ \frac{\sum [w(F_o^2 - F_c^2)]^2}{\sum [w(F_o^2)]^2} \right\}^{1/2}$$

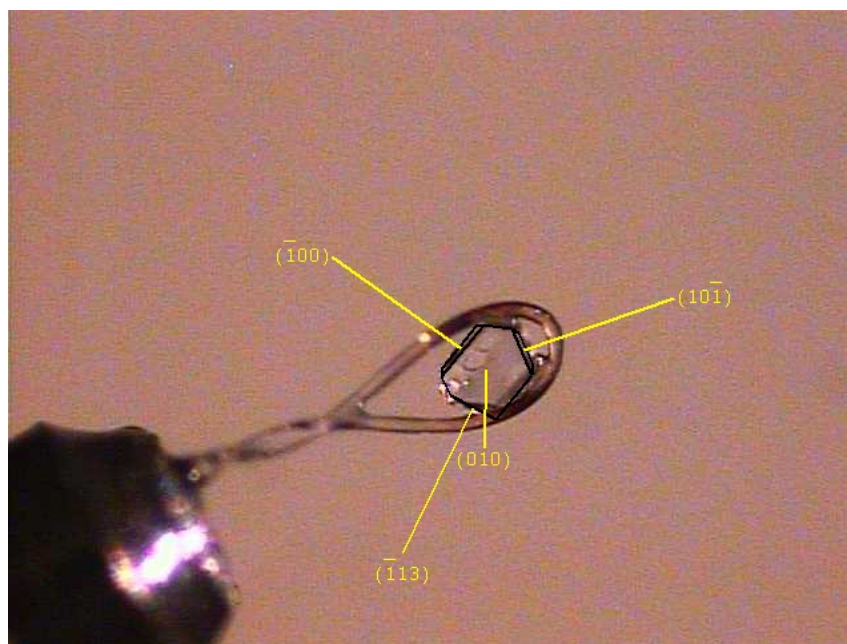

The following are 50% thermal ellipsoidal drawings of the molecule in the asymmetric cell with various amount of labeling.

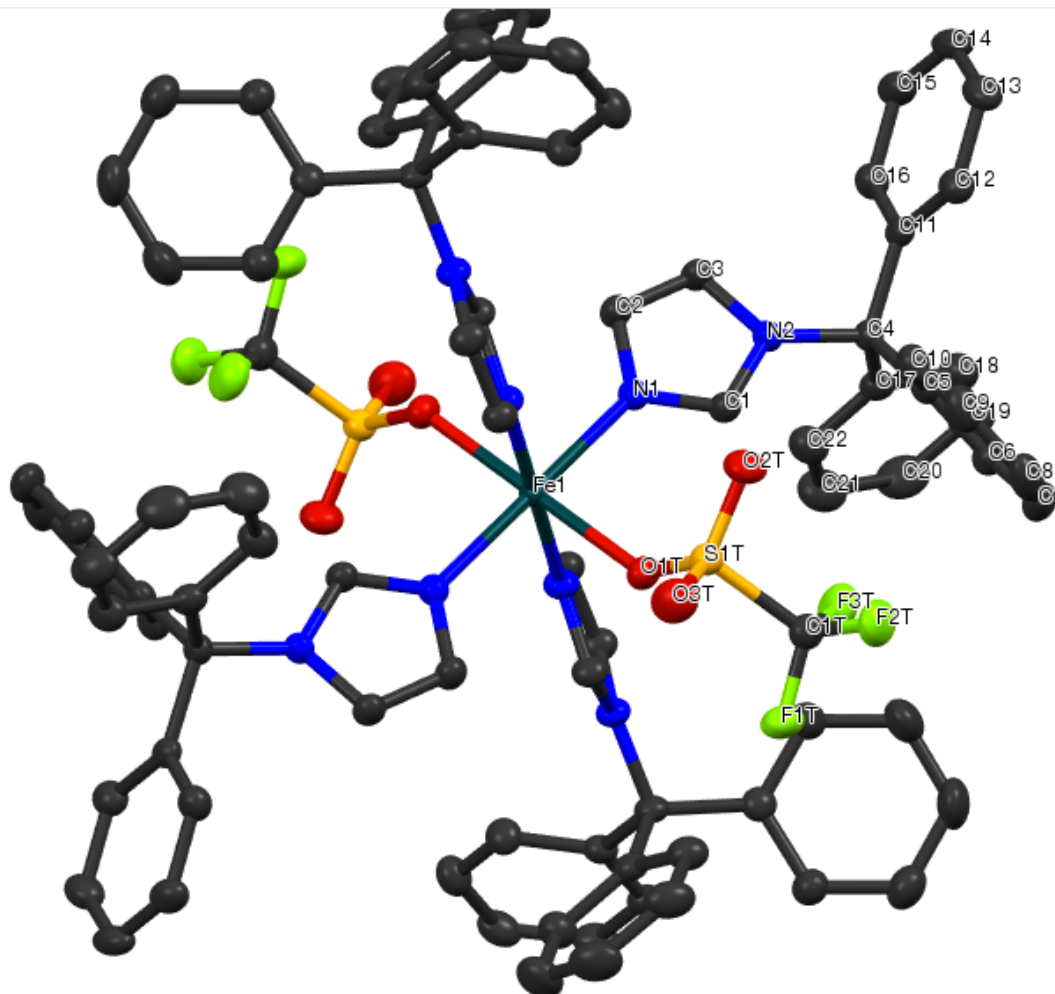

This figure shows the atom numbering scheme for the metal, one organic ligand and one triflate anion. The other crystallographically unique organic ligand follows the same numbering scheme as the one shown, but with an 'a' suffix.

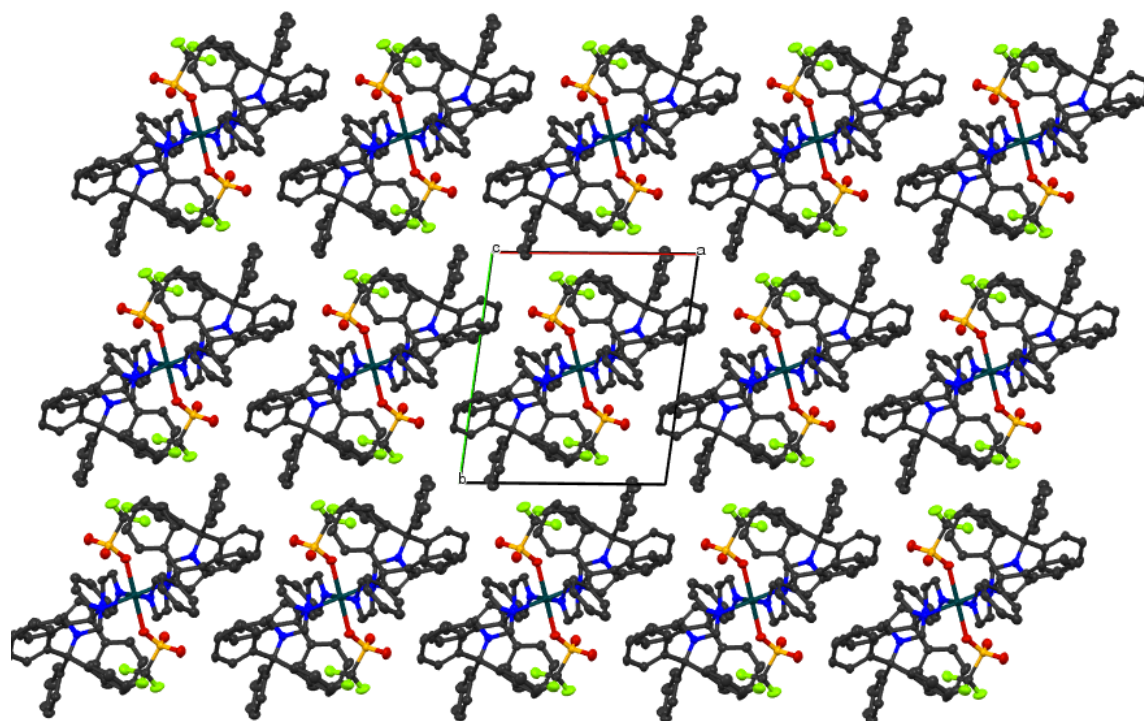

This is a drawing of the packing along the c-axis. The solvent diethyl ether molecule is not shown.

**Table S1.** Crystal data and structure refinement for [Fe(TrIm)<sub>4</sub>(OTf)<sub>2</sub>] (**1**).

|                                                              |                                                                                               |
|--------------------------------------------------------------|-----------------------------------------------------------------------------------------------|
| Identification code                                          | CF316a                                                                                        |
| Empirical formula                                            | C <sub>98</sub> H <sub>92</sub> F <sub>6</sub> FeN <sub>8</sub> O <sub>8</sub> S <sub>2</sub> |
| Formula weight                                               | 1743.76                                                                                       |
| Temperature/K                                                | 173.15                                                                                        |
| Crystal system                                               | triclinic                                                                                     |
| Space group                                                  | <i>P</i> 1                                                                                    |
| <i>a</i> /Å                                                  | 13.2342(7)                                                                                    |
| <i>b</i> /Å                                                  | 13.5131(7)                                                                                    |
| <i>c</i> /Å                                                  | 13.7025(7)                                                                                    |
| $\alpha$ /°                                                  | 98.0060(10)                                                                                   |
| $\beta$ /°                                                   | 116.1990(10)                                                                                  |
| $\gamma$ /°                                                  | 93.3490(10)                                                                                   |
| Volume/Å <sup>3</sup>                                        | 2157.39(19)                                                                                   |
| <i>Z</i>                                                     | 1                                                                                             |
| $\rho_{\text{calc}}$ /cm <sup>3</sup>                        | 1.342                                                                                         |
| $\mu$ /mm <sup>-1</sup>                                      | 0.300                                                                                         |
| <i>F</i> (000)                                               | 912.0                                                                                         |
| Crystal size/mm <sup>3</sup>                                 | 0.224 × 0.185 × 0.064                                                                         |
| Radiation                                                    | MoK $\alpha$ ( $\lambda$ = 0.71073)                                                           |
| 2 $\Theta$ range for data collection/°                       | 3.072 to 50.786                                                                               |
| Index ranges                                                 | -15 ≤ <i>h</i> ≤ 15, -16 ≤ <i>k</i> ≤ 16, -16 ≤ <i>l</i> ≤ 16                                 |
| Reflections collected                                        | 29627                                                                                         |
| Independent reflections                                      | 7927 [ <i>R</i> <sub>int</sub> = 0.0346, <i>R</i> <sub>sigma</sub> = 0.0345]                  |
| Data/restraints/parameters                                   | 7927/0/558                                                                                    |
| Goodness-of-fit on <i>F</i> <sup>2</sup>                     | 1.035                                                                                         |
| Final <i>R</i> indexes [ <i>I</i> ≥ 2 $\sigma$ ( <i>I</i> )] | <i>R</i> <sub>1</sub> = 0.0384, <i>wR</i> <sub>2</sub> = 0.0948                               |
| Final <i>R</i> indexes [all data]                            | <i>R</i> <sub>1</sub> = 0.0508, <i>wR</i> <sub>2</sub> = 0.1032                               |
| Largest diff. peak/hole / e Å <sup>-3</sup>                  | 0.32/-0.35                                                                                    |

**Table S2.** Fractional Atomic Coordinates (×10<sup>4</sup>) and Equivalent Isotropic Displacement Parameters (Å<sup>2</sup>×10<sup>3</sup>) for [Fe(TrIm)<sub>4</sub>(OTf)<sub>2</sub>] (**1**). *U*<sub>eq</sub> is defined as 1/3 of the trace of the orthogonalised *U*<sub>ij</sub> tensor.

| Atom | <i>x</i>   | <i>y</i>   | <i>z</i>   | <i>U</i> (eq) |
|------|------------|------------|------------|---------------|
| Fe1  | 5000       | 5000       | 10000      | 18.66(10)     |
| N1   | 5768.8(13) | 5084.0(12) | 8889.9(12) | 21.3(3)       |
| N2   | 6481.9(13) | 4602.6(11) | 7735.7(12) | 21.4(3)       |
| C1   | 5937.8(16) | 4309.5(14) | 8305.8(15) | 23.0(4)       |
| C2   | 6239.8(17) | 5921.1(15) | 8695.0(16) | 26.2(4)       |

|      |             |             |            |         |
|------|-------------|-------------|------------|---------|
| C3   | 6676.4(17)  | 5638.7(14)  | 7989.1(16) | 26.1(4) |
| C4   | 6932.6(16)  | 3908.7(14)  | 7111.3(15) | 22.2(4) |
| C5   | 6100.5(17)  | 2921.8(14)  | 6617.3(15) | 24.1(4) |
| C6   | 6465.0(19)  | 1980.2(15)  | 6726.8(17) | 30.0(5) |
| C7   | 5686(2)     | 1110.0(16)  | 6251.4(19) | 40.4(6) |
| C8   | 4543(2)     | 1158.0(17)  | 5672.4(19) | 41.4(6) |
| C9   | 4168.1(19)  | 2081.3(18)  | 5566.3(18) | 37.5(5) |
| C10  | 4936.0(17)  | 2953.2(16)  | 6032.2(17) | 29.9(5) |
| C11  | 7011.8(17)  | 4432.8(14)  | 6208.4(16) | 23.2(4) |
| C12  | 6240.1(18)  | 4169.0(16)  | 5093.0(17) | 29.1(5) |
| C13  | 6349.0(19)  | 4665.6(17)  | 4314.7(18) | 34.8(5) |
| C14  | 7227.8(19)  | 5432.1(17)  | 4632.8(19) | 36.1(5) |
| C15  | 8007.6(19)  | 5697.5(16)  | 5735.1(19) | 33.7(5) |
| C16  | 7905.7(18)  | 5201.1(15)  | 6510.3(17) | 28.4(4) |
| C17  | 8130.6(17)  | 3719.5(14)  | 7915.9(16) | 25.2(4) |
| C18  | 8831.1(18)  | 3319.7(16)  | 7485.4(18) | 32.7(5) |
| C19  | 9890.2(19)  | 3100.9(18)  | 8166(2)    | 40.2(6) |
| C20  | 10285.4(19) | 3287.3(19)  | 9301(2)    | 44.1(6) |
| C21  | 9608(2)     | 3683.7(19)  | 9737(2)    | 43.1(6) |
| C22  | 8531.6(18)  | 3901.1(16)  | 9053.3(17) | 32.6(5) |
| N1A  | 3470.8(13)  | 5577.7(12)  | 8920.8(13) | 24.2(4) |
| N2A  | 2479.7(13)  | 6717.7(11)  | 8042.7(12) | 21.8(3) |
| C1A  | 3519.0(16)  | 6447.2(14)  | 8597.8(15) | 23.5(4) |
| C2A  | 2333.2(16)  | 5271.5(15)  | 8554.9(16) | 25.5(4) |
| C3A  | 1713.3(16)  | 5958.8(15)  | 8014.8(16) | 25.8(4) |
| C4A  | 2191.6(16)  | 7667.4(14)  | 7584.7(15) | 22.4(4) |
| C5A  | 1161.4(16)  | 7349.1(14)  | 6431.5(15) | 22.6(4) |
| C6A  | 1154.4(17)  | 6496.6(16)  | 5724.4(16) | 28.2(4) |
| C7A  | 289.5(18)   | 6218.8(17)  | 4662.5(17) | 31.8(5) |
| C8A  | -603.6(17)  | 6775.4(17)  | 4276.9(17) | 32.0(5) |
| C9A  | -628.5(17)  | 7602.7(16)  | 4975.4(17) | 30.9(5) |
| C10A | 245.0(16)   | 7889.2(15)  | 6047.4(16) | 25.8(4) |
| C11A | 1936.7(16)  | 8418.4(15)  | 8375.8(15) | 24.6(4) |
| C12A | 1799(2)     | 8160.3(17)  | 9256.1(18) | 36.2(5) |
| C13A | 1579(2)     | 8875.7(19)  | 9946(2)    | 49.8(7) |
| C14A | 1506(2)     | 9848.3(19)  | 9767(2)    | 50.2(7) |
| C15A | 1653(2)     | 10121.0(17) | 8900(2)    | 40.2(5) |
| C16A | 1869.6(18)  | 9410.3(15)  | 8214.5(17) | 30.1(5) |
| C17A | 3250.5(16)  | 8138.0(14)  | 7519.0(16) | 23.5(4) |
| C18A | 4158.2(17)  | 8666.9(15)  | 8483.7(17) | 30.0(5) |
| C19A | 5147.3(19)  | 9061.3(17)  | 8480(2)    | 38.7(5) |
| C20A | 5232(2)     | 8949.2(19)  | 7509(2)    | 43.6(6) |



|      |            |             |            |           |
|------|------------|-------------|------------|-----------|
| C21A | 4337(2)    | 8447.5(19)  | 6542(2)    | 43.9(6)   |
| C22A | 3352.9(19) | 8043.4(16)  | 6546.7(18) | 32.7(5)   |
| S1T  | 3404.7(4)  | 2831.7(4)   | 8301.4(4)  | 23.28(12) |
| F1T  | 4045.8(11) | 1183.8(9)   | 9056.4(10) | 39.9(3)   |
| F2T  | 3286.1(12) | 1011.6(9)   | 7284.9(10) | 45.6(3)   |
| F3T  | 4990.4(11) | 1774.3(10)  | 8277.9(11) | 42.9(3)   |
| O1T  | 4311.4(12) | 3411.4(10)  | 9320.7(11) | 27.9(3)   |
| O2T  | 3292.7(12) | 3181.3(11)  | 7325.8(11) | 34.1(3)   |
| O3T  | 2379.3(12) | 2572.0(12)  | 8370.4(13) | 40.3(4)   |
| C1T  | 3961.8(17) | 1637.9(15)  | 8226.0(16) | 28.4(4)   |
| O1S  | 8456.0(16) | 9357.5(12)  | 6519.9(14) | 51.7(5)   |
| C1S  | 8201(3)    | 8156(2)     | 7535(3)    | 74.8(10)  |
| C2S  | 8401(3)    | 9226(2)     | 7483(2)    | 56.8(7)   |
| C3S  | 8718(3)    | 10349.0(19) | 6457(3)    | 55.4(7)   |
| C4S  | 8768(4)    | 10451(3)    | 5444(3)    | 104.2(14) |

**Table S3.** Anisotropic Displacement Parameters ( $\text{\AA}^2 \times 10^3$ ) for  $[\text{Fe}(\text{TrIm})_4(\text{OTf})_2]$  (**1**). The Anisotropic displacement factor exponent takes the form:  $-2\pi^2[h^2a^{*2}U_{11}+2hka^*b^*U_{12}+\dots]$ .

| Atom | $U_{11}$ | $U_{22}$ | $U_{33}$ | $U_{23}$  | $U_{13}$  | $U_{12}$  |
|------|----------|----------|----------|-----------|-----------|-----------|
| Fe1  | 19.6(2)  | 19.1(2)  | 20.3(2)  | 5.79(15)  | 10.67(16) | 6.05(15)  |
| N1   | 21.1(8)  | 22.5(8)  | 21.9(8)  | 4.6(7)    | 10.8(7)   | 4.5(7)    |
| N2   | 22.7(8)  | 22.1(8)  | 23.7(8)  | 4.6(7)    | 14.2(7)   | 3.4(7)    |
| C1   | 25.1(10) | 21(1)    | 28.4(10) | 6.4(8)    | 16.3(9)   | 3.7(8)    |
| C2   | 31.6(11) | 19.9(10) | 31.0(11) | 4.0(8)    | 17.9(9)   | 2.5(8)    |
| C3   | 31.5(11) | 20.1(10) | 32.5(11) | 5.5(8)    | 19.7(9)   | 1.5(8)    |
| C4   | 24.7(10) | 21.5(10) | 25.3(10) | 4.9(8)    | 15.3(9)   | 5.7(8)    |
| C5   | 29.1(11) | 24.5(10) | 23.8(10) | 2.8(8)    | 17.1(9)   | 3.4(8)    |
| C6   | 36.7(12) | 26.1(11) | 34.3(11) | 6.7(9)    | 21.8(10)  | 7.1(9)    |
| C7   | 61.4(17) | 22.4(11) | 45.8(13) | 1.6(10)   | 33.6(13)  | 2.2(11)   |
| C8   | 52.1(16) | 33.2(13) | 39.7(13) | -10.8(10) | 29.2(12)  | -15.1(11) |
| C9   | 31.1(12) | 45.1(14) | 33.6(12) | -5.3(10)  | 17.4(10)  | -5.4(10)  |
| C10  | 29.5(12) | 31.0(11) | 32.1(11) | 2.6(9)    | 17.6(10)  | 3.7(9)    |
| C11  | 28.3(11) | 21(1)    | 30(1)    | 7.9(8)    | 20.2(9)   | 9.6(8)    |
| C12  | 29.2(11) | 30.9(11) | 31.6(11) | 8.9(9)    | 16.2(9)   | 9.9(9)    |
| C13  | 38.3(13) | 43.7(13) | 29.8(11) | 16.3(10)  | 17.7(10)  | 18.2(11)  |
| C14  | 45.6(14) | 38.1(13) | 46.0(13) | 25.8(11)  | 32.5(12)  | 22.6(11)  |
| C15  | 39.2(13) | 31.5(12) | 44.7(13) | 14.2(10)  | 29.2(11)  | 10.2(10)  |
| C16  | 30.8(11) | 28.8(11) | 30.0(11) | 4.9(9)    | 18.0(9)   | 4.4(9)    |
| C17  | 25(1)    | 22.8(10) | 30.7(11) | 8.3(8)    | 14.3(9)   | 3.0(8)    |
| C18  | 30.5(12) | 37.0(12) | 38.4(12) | 10.8(10)  | 21.1(10)  | 8.5(10)   |
| C19  | 29.3(12) | 42.8(14) | 58.2(15) | 18.3(12)  | 24.9(12)  | 12.7(10)  |

|      |          |          |          |          |          |          |
|------|----------|----------|----------|----------|----------|----------|
| C20  | 24.0(12) | 49.9(15) | 54.7(15) | 20.2(12) | 11.0(11) | 9.0(11)  |
| C21  | 34.7(13) | 51.3(15) | 35.0(13) | 11.3(11) | 7.9(11)  | 3.2(11)  |
| C22  | 29.6(12) | 37.2(12) | 32.3(11) | 7.3(10)  | 15.4(10) | 2.4(10)  |
| N1A  | 22.5(9)  | 25.8(9)  | 25.7(8)  | 9.6(7)   | 10.4(7)  | 6.9(7)   |
| N2A  | 19.1(8)  | 22.2(8)  | 23.6(8)  | 8.2(7)   | 7.9(7)   | 5.3(7)   |
| C1A  | 18(1)    | 26.4(10) | 25.6(10) | 8.9(8)   | 7.9(8)   | 5.8(8)   |
| C2A  | 24.7(11) | 23.9(10) | 27.9(10) | 6.5(8)   | 11.6(9)  | 3.0(8)   |
| C3A  | 17.8(10) | 26.4(10) | 31.3(11) | 7.7(9)   | 8.8(9)   | 2.9(8)   |
| C4A  | 22.1(10) | 22.8(10) | 24.4(10) | 10.6(8)  | 10.0(8)  | 7.2(8)   |
| C5A  | 21.4(10) | 25.3(10) | 22.6(10) | 8.9(8)   | 9.9(8)   | 4.6(8)   |
| C6A  | 23.8(11) | 32.2(11) | 28.9(11) | 7.4(9)   | 11.2(9)  | 8.9(9)   |
| C7A  | 30.7(12) | 37.1(12) | 26.3(11) | 1.0(9)   | 13.4(9)  | 1.7(10)  |
| C8A  | 23.2(11) | 45.3(13) | 24.7(10) | 10.3(10) | 7.7(9)   | 0.7(10)  |
| C9A  | 20.4(10) | 38.6(12) | 35.6(12) | 18.2(10) | 10.8(9)  | 8.3(9)   |
| C10A | 23.1(10) | 26.8(11) | 31.2(11) | 11.2(9)  | 13.6(9)  | 6.4(8)   |
| C11A | 19.5(10) | 27.4(10) | 24(1)    | 4.6(8)   | 7.4(8)   | 2.7(8)   |
| C12A | 46.5(14) | 32.5(12) | 32.2(12) | 6.8(10)  | 20.0(11) | 6.1(10)  |
| C13A | 72.7(19) | 48.6(15) | 40.4(14) | 6.3(12)  | 37.4(14) | 7.8(13)  |
| C14A | 68.7(18) | 39.2(14) | 49.1(15) | -6.5(12) | 36.7(14) | 7.1(13)  |
| C15A | 43.8(14) | 28.3(12) | 49.5(14) | 3.3(10)  | 23.0(12) | 6.3(10)  |
| C16A | 31.8(12) | 27.3(11) | 34.2(11) | 6.6(9)   | 17.1(10) | 5.8(9)   |
| C17A | 21.8(10) | 21.7(10) | 29.8(10) | 10.8(8)  | 12.0(9)  | 7.2(8)   |
| C18A | 25.4(11) | 31.3(11) | 32.6(11) | 11.1(9)  | 11.1(9)  | 3.8(9)   |
| C19A | 26.3(12) | 39.3(13) | 44.7(13) | 16.0(11) | 9.4(10)  | -1.9(10) |
| C20A | 31.0(13) | 50.0(15) | 60.1(16) | 24.0(13) | 25.9(12) | 4.7(11)  |
| C21A | 46.0(15) | 53.4(15) | 46.2(14) | 15.5(12) | 31.7(13) | 5.6(12)  |
| C22A | 34.3(12) | 33.6(12) | 32.3(11) | 6.9(9)   | 16.9(10) | 3(1)     |
| S1T  | 20.7(3)  | 24.5(3)  | 24.6(2)  | 6.4(2)   | 9.7(2)   | 4.6(2)   |
| F1T  | 52.8(8)  | 30.5(7)  | 38.3(7)  | 14.5(6)  | 19.7(6)  | 8.8(6)   |
| F2T  | 59.2(9)  | 30.9(7)  | 36.3(7)  | -8.1(6)  | 17.7(7)  | -5.8(6)  |
| F3T  | 38.1(7)  | 38.3(7)  | 62.0(9)  | 7.2(6)   | 30.9(7)  | 13.5(6)  |
| O1T  | 33.5(8)  | 21.4(7)  | 25.7(7)  | 3.2(6)   | 11.2(6)  | 3.3(6)   |
| O2T  | 33.7(8)  | 39.6(9)  | 27.7(8)  | 14.3(7)  | 10.1(7)  | 8.4(7)   |
| O3T  | 26.3(8)  | 45.1(10) | 56.2(10) | 13.3(8)  | 23.5(8)  | 6.2(7)   |
| C1T  | 30.6(11) | 25.1(11) | 26.7(10) | 2.1(9)   | 11.7(9)  | 0.7(9)   |
| O1S  | 71.6(13) | 39.1(10) | 51.6(11) | 6.0(8)   | 35.7(10) | 3.0(9)   |
| C1S  | 116(3)   | 57.3(19) | 65(2)    | 12.9(16) | 54(2)    | 6.5(19)  |
| C2S  | 64.8(19) | 54.9(17) | 58.1(17) | 3.5(14)  | 37.1(15) | 3.4(14)  |
| C3S  | 57.2(17) | 38.0(14) | 78(2)    | 11.6(14) | 36.9(16) | 9.2(13)  |
| C4S  | 142(4)   | 82(3)    | 113(3)   | 43(2)    | 74(3)    | -1(3)    |

**Table S4.** Bond Lengths for [Fe(TrIm)<sub>4</sub>(OTf)<sub>2</sub>] (1).

| <b>Atom</b> | <b>Atom</b>      | <b>Length/Å</b> | <b>Atom</b> | <b>Atom</b> | <b>Length/Å</b> |
|-------------|------------------|-----------------|-------------|-------------|-----------------|
| Fe1         | N1               | 2.1823(15)      | N2A         | C3A         | 1.384(2)        |
| Fe1         | N1 <sup>1</sup>  | 2.1823(15)      | N2A         | C4A         | 1.502(2)        |
| Fe1         | N1A              | 2.1807(15)      | C2A         | C3A         | 1.352(3)        |
| Fe1         | N1A <sup>1</sup> | 2.1808(15)      | C4A         | C5A         | 1.543(3)        |
| Fe1         | O1T <sup>1</sup> | 2.1843(13)      | C4A         | C11A        | 1.541(3)        |
| Fe1         | O1T              | 2.1843(13)      | C4A         | C17A        | 1.549(3)        |
| N1          | C1               | 1.318(2)        | C5A         | C6A         | 1.395(3)        |
| N1          | C2               | 1.374(2)        | C5A         | C10A        | 1.388(3)        |
| N2          | C1               | 1.355(2)        | C6A         | C7A         | 1.377(3)        |
| N2          | C3               | 1.375(2)        | C7A         | C8A         | 1.380(3)        |
| N2          | C4               | 1.503(2)        | C8A         | C9A         | 1.379(3)        |
| C2          | C3               | 1.353(3)        | C9A         | C10A        | 1.391(3)        |
| C4          | C5               | 1.539(3)        | C11A        | C12A        | 1.383(3)        |
| C4          | C11              | 1.547(2)        | C11A        | C16A        | 1.390(3)        |
| C4          | C17              | 1.542(3)        | C12A        | C13A        | 1.392(3)        |
| C5          | C6               | 1.391(3)        | C13A        | C14A        | 1.372(4)        |
| C5          | C10              | 1.395(3)        | C14A        | C15A        | 1.379(3)        |
| C6          | C7               | 1.386(3)        | C15A        | C16A        | 1.380(3)        |
| C7          | C8               | 1.374(3)        | C17A        | C18A        | 1.391(3)        |
| C8          | C9               | 1.372(3)        | C17A        | C22A        | 1.387(3)        |
| C9          | C10              | 1.381(3)        | C18A        | C19A        | 1.387(3)        |
| C11         | C12              | 1.390(3)        | C19A        | C20A        | 1.372(3)        |
| C11         | C16              | 1.398(3)        | C20A        | C21A        | 1.374(3)        |
| C12         | C13              | 1.390(3)        | C21A        | C22A        | 1.385(3)        |
| C13         | C14              | 1.379(3)        | S1T         | O1T         | 1.4524(14)      |
| C14         | C15              | 1.380(3)        | S1T         | O2T         | 1.4288(14)      |
| C15         | C16              | 1.382(3)        | S1T         | O3T         | 1.4284(15)      |
| C17         | C18              | 1.397(3)        | S1T         | C1T         | 1.821(2)        |
| C17         | C22              | 1.385(3)        | F1T         | C1T         | 1.332(2)        |
| C18         | C19              | 1.376(3)        | F2T         | C1T         | 1.330(2)        |
| C19         | C20              | 1.383(3)        | F3T         | C1T         | 1.332(2)        |
| C20         | C21              | 1.374(3)        | O1S         | C2S         | 1.388(3)        |
| C21         | C22              | 1.393(3)        | O1S         | C3S         | 1.388(3)        |
| N1A         | C1A              | 1.320(2)        | C1S         | C2S         | 1.471(4)        |
| N1A         | C2A              | 1.376(2)        | C3S         | C4S         | 1.444(4)        |
| N2A         | C1A              | 1.348(2)        |             |             |                 |

<sup>1</sup>1-X,1-Y,2-Z

**Table S5.** Bond Angles for [Fe(TrIm)<sub>4</sub>(OTf)<sub>2</sub>] (1).

| Atom             | Atom | Atom             | Angle/°    | Atom | Atom | Atom | Angle/°    |
|------------------|------|------------------|------------|------|------|------|------------|
| N1 <sup>1</sup>  | Fe1  | N1               | 180.00(8)  | C1A  | N1A  | C2A  | 105.30(15) |
| N1 <sup>1</sup>  | Fe1  | O1T <sup>1</sup> | 93.07(5)   | C2A  | N1A  | Fe1  | 132.42(12) |
| N1               | Fe1  | O1T              | 93.07(5)   | C1A  | N2A  | C3A  | 106.12(15) |
| N1               | Fe1  | O1T <sup>1</sup> | 86.93(5)   | C1A  | N2A  | C4A  | 127.81(15) |
| N1 <sup>1</sup>  | Fe1  | O1T              | 86.93(5)   | C3A  | N2A  | C4A  | 126.02(15) |
| N1A <sup>1</sup> | Fe1  | N1               | 86.87(6)   | N1A  | C1A  | N2A  | 112.17(16) |
| N1A              | Fe1  | N1               | 93.13(6)   | C3A  | C2A  | N1A  | 109.88(17) |
| N1A <sup>1</sup> | Fe1  | N1 <sup>1</sup>  | 93.13(6)   | C2A  | C3A  | N2A  | 106.53(17) |
| N1A              | Fe1  | N1 <sup>1</sup>  | 86.87(6)   | N2A  | C4A  | C5A  | 106.37(15) |
| N1A              | Fe1  | N1A <sup>1</sup> | 180.00(9)  | N2A  | C4A  | C11A | 109.76(14) |
| N1A              | Fe1  | O1T <sup>1</sup> | 84.76(6)   | N2A  | C4A  | C17A | 107.30(14) |
| N1A <sup>1</sup> | Fe1  | O1T              | 84.76(6)   | C5A  | C4A  | C17A | 112.07(15) |
| N1A              | Fe1  | O1T              | 95.24(6)   | C11A | C4A  | C5A  | 112.55(15) |
| N1A <sup>1</sup> | Fe1  | O1T <sup>1</sup> | 95.24(6)   | C11A | C4A  | C17A | 108.64(15) |
| O1T <sup>1</sup> | Fe1  | O1T              | 180.0      | C6A  | C5A  | C4A  | 119.08(17) |
| C1               | N1   | Fe1              | 125.92(12) | C10A | C5A  | C4A  | 122.95(17) |
| C1               | N1   | C2               | 105.15(15) | C10A | C5A  | C6A  | 117.95(18) |
| C2               | N1   | Fe1              | 128.82(12) | C7A  | C6A  | C5A  | 121.23(19) |
| C1               | N2   | C3               | 106.06(15) | C6A  | C7A  | C8A  | 120.4(2)   |
| C1               | N2   | C4               | 125.24(15) | C9A  | C8A  | C7A  | 119.13(19) |
| C3               | N2   | C4               | 128.02(15) | C8A  | C9A  | C10A | 120.68(19) |
| N1               | C1   | N2               | 112.12(16) | C5A  | C10A | C9A  | 120.51(19) |
| C3               | C2   | N1               | 109.97(17) | C12A | C11A | C4A  | 123.21(18) |
| C2               | C3   | N2               | 106.70(16) | C12A | C11A | C16A | 118.32(19) |
| N2               | C4   | C5               | 106.93(14) | C16A | C11A | C4A  | 118.45(17) |
| N2               | C4   | C11              | 108.20(14) | C11A | C12A | C13A | 120.5(2)   |
| N2               | C4   | C17              | 109.14(15) | C14A | C13A | C12A | 120.3(2)   |
| C5               | C4   | C11              | 112.26(15) | C13A | C14A | C15A | 120.0(2)   |
| C5               | C4   | C17              | 111.09(15) | C14A | C15A | C16A | 119.7(2)   |
| C17              | C4   | C11              | 109.11(15) | C15A | C16A | C11A | 121.3(2)   |
| C6               | C5   | C4               | 122.33(18) | C18A | C17A | C4A  | 118.78(17) |
| C6               | C5   | C10              | 117.75(19) | C22A | C17A | C4A  | 123.32(18) |
| C10              | C5   | C4               | 119.92(17) | C22A | C17A | C18A | 117.89(18) |
| C7               | C6   | C5               | 120.3(2)   | C19A | C18A | C17A | 121.1(2)   |
| C8               | C7   | C6               | 121.0(2)   | C20A | C19A | C18A | 119.9(2)   |
| C9               | C8   | C7               | 119.5(2)   | C19A | C20A | C21A | 120.0(2)   |
| C8               | C9   | C10              | 120.1(2)   | C20A | C21A | C22A | 120.2(2)   |
| C9               | C10  | C5               | 121.4(2)   | C21A | C22A | C17A | 120.9(2)   |
| C12              | C11  | C4               | 123.21(17) | O1T  | S1T  | C1T  | 101.31(9)  |

|     |     |     |            |     |     |     |            |
|-----|-----|-----|------------|-----|-----|-----|------------|
| C12 | C11 | C16 | 117.51(18) | O2T | S1T | O1T | 114.11(9)  |
| C16 | C11 | C4  | 119.27(17) | O2T | S1T | C1T | 104.07(9)  |
| C13 | C12 | C11 | 120.9(2)   | O3T | S1T | O1T | 113.88(9)  |
| C14 | C13 | C12 | 120.6(2)   | O3T | S1T | O2T | 116.88(9)  |
| C13 | C14 | C15 | 119.24(19) | O3T | S1T | C1T | 104.09(9)  |
| C14 | C15 | C16 | 120.3(2)   | S1T | O1T | Fe1 | 136.70(8)  |
| C15 | C16 | C11 | 121.4(2)   | F1T | C1T | S1T | 111.09(14) |
| C18 | C17 | C4  | 119.02(18) | F2T | C1T | S1T | 111.02(14) |
| C22 | C17 | C4  | 122.60(17) | F2T | C1T | F1T | 107.67(16) |
| C22 | C17 | C18 | 118.35(19) | F2T | C1T | F3T | 107.87(16) |
| C19 | C18 | C17 | 121.3(2)   | F3T | C1T | S1T | 111.19(13) |
| C18 | C19 | C20 | 120.0(2)   | F3T | C1T | F1T | 107.85(17) |
| C21 | C20 | C19 | 119.4(2)   | C2S | O1S | C3S | 115.3(2)   |
| C20 | C21 | C22 | 121.0(2)   | O1S | C2S | C1S | 112.6(2)   |
| C17 | C22 | C21 | 120.0(2)   | O1S | C3S | C4S | 113.4(3)   |
| C1A | N1A | Fe1 | 121.76(13) |     |     |     |            |

<sup>1</sup>1-X,1-Y,2-Z

**Table S6.** Torsion Angles for [Fe(TrIm)<sub>4</sub>(OTf)<sub>2</sub>] (**1**).

| A   | B   | C   | D   | Angle/°     | A   | B    | C    | D    | Angle/°     |
|-----|-----|-----|-----|-------------|-----|------|------|------|-------------|
| Fe1 | N1  | C1  | N2  | -177.03(12) | N2A | C4A  | C17A | C18A | -78.0(2)    |
| Fe1 | N1  | C2  | C3  | 176.77(13)  | N2A | C4A  | C17A | C22A | 100.6(2)    |
| Fe1 | N1A | C1A | N2A | -172.88(12) | C1A | N1A  | C2A  | C3A  | 0.2(2)      |
| Fe1 | N1A | C2A | C3A | 171.75(14)  | C1A | N2A  | C3A  | C2A  | 0.0(2)      |
| N1  | C2  | C3  | N2  | -0.2(2)     | C1A | N2A  | C4A  | C5A  | 138.07(18)  |
| N2  | C4  | C5  | C6  | -130.97(18) | C1A | N2A  | C4A  | C11A | -99.9(2)    |
| N2  | C4  | C5  | C10 | 49.3(2)     | C1A | N2A  | C4A  | C17A | 18.0(2)     |
| N2  | C4  | C11 | C12 | -104.2(2)   | C2A | N1A  | C1A  | N2A  | -0.2(2)     |
| N2  | C4  | C11 | C16 | 76.8(2)     | C3A | N2A  | C1A  | N1A  | 0.1(2)      |
| N2  | C4  | C17 | C18 | -163.55(17) | C3A | N2A  | C4A  | C5A  | -45.0(2)    |
| N2  | C4  | C17 | C22 | 18.5(2)     | C3A | N2A  | C4A  | C11A | 77.1(2)     |
| C1  | N1  | C2  | C3  | 0.5(2)      | C3A | N2A  | C4A  | C17A | -165.07(17) |
| C1  | N2  | C3  | C2  | -0.1(2)     | C4A | N2A  | C1A  | N1A  | 177.58(16)  |
| C1  | N2  | C4  | C5  | 35.0(2)     | C4A | N2A  | C3A  | C2A  | -177.52(17) |
| C1  | N2  | C4  | C11 | 156.16(17)  | C4A | C5A  | C6A  | C7A  | -175.84(18) |
| C1  | N2  | C4  | C17 | -85.2(2)    | C4A | C5A  | C10A | C9A  | 176.04(17)  |
| C2  | N1  | C1  | N2  | -0.6(2)     | C4A | C11A | C12A | C13A | 179.5(2)    |
| C3  | N2  | C1  | N1  | 0.5(2)      | C4A | C11A | C16A | C15A | -179.49(19) |
| C3  | N2  | C4  | C5  | -155.72(18) | C4A | C17A | C18A | C19A | 176.89(18)  |
| C3  | N2  | C4  | C11 | -34.6(2)    | C4A | C17A | C22A | C21A | -177.54(19) |
| C3  | N2  | C4  | C17 | 84.0(2)     | C5A | C4A  | C11A | C12A | 107.6(2)    |

|     |     |      |      |             |      |      |      |      |             |
|-----|-----|------|------|-------------|------|------|------|------|-------------|
| C4  | N2  | C1   | N1   | 171.71(16)  | C5A  | C4A  | C11A | C16A | -74.1(2)    |
| C4  | N2  | C3   | C2   | -171.02(17) | C5A  | C4A  | C17A | C18A | 165.55(17)  |
| C4  | C5  | C6   | C7   | -178.88(18) | C5A  | C4A  | C17A | C22A | -15.8(3)    |
| C4  | C5  | C10  | C9   | 179.14(18)  | C5A  | C6A  | C7A  | C8A  | -0.8(3)     |
| C4  | C11 | C12  | C13  | 179.90(18)  | C6A  | C5A  | C10A | C9A  | -2.2(3)     |
| C4  | C11 | C16  | C15  | -179.46(18) | C6A  | C7A  | C8A  | C9A  | -1.1(3)     |
| C4  | C17 | C18  | C19  | -177.49(19) | C7A  | C8A  | C9A  | C10A | 1.4(3)      |
| C4  | C17 | C22  | C21  | 177.85(19)  | C8A  | C9A  | C10A | C5A  | 0.3(3)      |
| C5  | C4  | C11  | C12  | 13.6(2)     | C10A | C5A  | C6A  | C7A  | 2.5(3)      |
| C5  | C4  | C11  | C16  | -165.46(17) | C11A | C4A  | C5A  | C6A  | -163.85(17) |
| C5  | C4  | C17  | C18  | 78.8(2)     | C11A | C4A  | C5A  | C10A | 17.9(2)     |
| C5  | C4  | C17  | C22  | -99.2(2)    | C11A | C4A  | C17A | C18A | 40.6(2)     |
| C5  | C6  | C7   | C8   | -0.5(3)     | C11A | C4A  | C17A | C22A | -140.75(19) |
| C6  | C5  | C10  | C9   | -0.6(3)     | C11A | C12A | C13A | C14A | -0.6(4)     |
| C6  | C7  | C8   | C9   | -0.2(3)     | C12A | C11A | C16A | C15A | -1.1(3)     |
| C7  | C8  | C9   | C10  | 0.4(3)      | C12A | C13A | C14A | C15A | -0.1(4)     |
| C8  | C9  | C10  | C5   | 0.0(3)      | C13A | C14A | C15A | C16A | 0.2(4)      |
| C10 | C5  | C6   | C7   | 0.9(3)      | C14A | C15A | C16A | C11A | 0.4(3)      |
| C11 | C4  | C5   | C6   | 110.5(2)    | C16A | C11A | C12A | C13A | 1.2(3)      |
| C11 | C4  | C5   | C10  | -69.2(2)    | C17A | C4A  | C5A  | C6A  | 73.4(2)     |
| C11 | C4  | C17  | C18  | -45.5(2)    | C17A | C4A  | C5A  | C10A | -104.9(2)   |
| C11 | C4  | C17  | C22  | 136.53(19)  | C17A | C4A  | C11A | C12A | -127.7(2)   |
| C11 | C12 | C13  | C14  | 0.1(3)      | C17A | C4A  | C11A | C16A | 50.6(2)     |
| C12 | C11 | C16  | C15  | 1.4(3)      | C17A | C18A | C19A | C20A | 1.3(3)      |
| C12 | C13 | C14  | C15  | 0.5(3)      | C18A | C17A | C22A | C21A | 1.2(3)      |
| C13 | C14 | C15  | C16  | -0.2(3)     | C18A | C19A | C20A | C21A | 0.1(4)      |
| C14 | C15 | C16  | C11  | -0.8(3)     | C19A | C20A | C21A | C22A | -0.8(4)     |
| C16 | C11 | C12  | C13  | -1.0(3)     | C20A | C21A | C22A | C17A | 0.2(4)      |
| C17 | C4  | C5   | C6   | -12.0(2)    | C22A | C17A | C18A | C19A | -1.9(3)     |
| C17 | C4  | C5   | C10  | 168.28(16)  | O1T  | S1T  | C1T  | F1T  | 65.28(15)   |
| C17 | C4  | C11  | C12  | 137.20(19)  | O1T  | S1T  | C1T  | F2T  | -174.94(13) |
| C17 | C4  | C11  | C16  | -41.9(2)    | O1T  | S1T  | C1T  | F3T  | -54.84(15)  |
| C17 | C18 | C19  | C20  | -0.8(3)     | O2T  | S1T  | O1T  | Fe1  | 40.17(15)   |
| C18 | C17 | C22  | C21  | -0.1(3)     | O2T  | S1T  | C1T  | F1T  | -176.06(13) |
| C18 | C19 | C20  | C21  | 0.5(4)      | O2T  | S1T  | C1T  | F2T  | -56.28(15)  |
| C19 | C20 | C21  | C22  | -0.1(4)     | O2T  | S1T  | C1T  | F3T  | 63.82(15)   |
| C20 | C21 | C22  | C17  | -0.1(3)     | O3T  | S1T  | O1T  | Fe1  | -97.55(13)  |
| C22 | C17 | C18  | C19  | 0.6(3)      | O3T  | S1T  | C1T  | F1T  | -53.14(16)  |
| N1A | C2A | C3A  | N2A  | -0.1(2)     | O3T  | S1T  | C1T  | F2T  | 66.64(16)   |
| N2A | C4A | C5A  | C6A  | -43.6(2)    | O3T  | S1T  | C1T  | F3T  | -173.26(14) |
| N2A | C4A | C5A  | C10A | 138.13(17)  | C1T  | S1T  | O1T  | Fe1  | 151.34(12)  |
| N2A | C4A | C11A | C12A | -10.7(3)    | C2S  | O1S  | C3S  | C4S  | 179.9(3)    |

N2AC4AC11AC16A167.64(17) C3S O1S C2S C1S -175.9(3)

**Table S7.** Hydrogen Atom Coordinates ( $\text{\AA}\times 10^4$ ) and Isotropic Displacement Parameters ( $\text{\AA}^2\times 10^3$ ) for CF316a.

| <b>Atom</b> | <b>x</b> | <b>y</b> | <b>z</b> | <b>U(eq)</b> |
|-------------|----------|----------|----------|--------------|
| H1          | 5705     | 3626     | 8287     | 28           |
| H2          | 6257     | 6598     | 9009     | 31           |
| H3          | 7046     | 6072     | 7721     | 31           |
| H6          | 7252     | 1933     | 7129     | 36           |
| H7          | 5946     | 471      | 6327     | 48           |
| H8          | 4017     | 557      | 5348     | 50           |
| H9          | 3379     | 2121     | 5172     | 45           |
| H10         | 4666     | 3588     | 5953     | 36           |
| H12         | 5630     | 3642     | 4860     | 35           |
| H13         | 5813     | 4475     | 3556     | 42           |
| H14         | 7296     | 5774     | 4099     | 43           |
| H15         | 8617     | 6223     | 5962     | 40           |
| H16         | 8455     | 5386     | 7265     | 34           |
| H18         | 8571     | 3197     | 6707     | 39           |
| H19         | 10350    | 2822     | 7856     | 48           |
| H20         | 11019    | 3143     | 9775     | 53           |
| H21         | 9878     | 3811     | 10517    | 52           |
| H22         | 8072     | 4174     | 9367     | 39           |
| H1A         | 4207     | 6837     | 8740     | 28           |
| H2A         | 2029     | 4667     | 8665     | 31           |
| H3A         | 909      | 5927     | 7681     | 31           |
| H6A         | 1758     | 6100     | 5980     | 34           |
| H7A         | 307      | 5640     | 4192     | 38           |
| H8A         | -1193    | 6591     | 3540     | 38           |
| H9A         | -1249    | 7981     | 4722     | 37           |
| H10A        | 214      | 8459     | 6520     | 31           |
| H12A        | 1856     | 7490     | 9390     | 43           |
| H13A        | 1478     | 8690     | 10545    | 60           |
| H14A        | 1353     | 10334    | 10239    | 60           |
| H15A        | 1605     | 10795    | 8775     | 48           |
| H16A        | 1975     | 9603     | 7621     | 36           |
| H18A        | 4099     | 8759     | 9156     | 36           |
| H19A        | 5765     | 9409     | 9149     | 46           |
| H20A        | 5910     | 9218     | 7505     | 52           |
| H21A        | 4393     | 8378     | 5869     | 53           |
| H22A        | 2740     | 7697     | 5874     | 39           |

|      |      |       |      |     |
|------|------|-------|------|-----|
| H1SA | 7503 | 7831  | 6882 | 112 |
| H1SB | 8124 | 8104  | 8205 | 112 |
| H1SC | 8844 | 7821  | 7551 | 112 |
| H2SA | 7781 | 9572  | 7529 | 68  |
| H2SB | 9123 | 9543  | 8129 | 68  |
| H3SA | 9462 | 10634 | 7091 | 66  |
| H3SB | 8139 | 10748 | 6520 | 66  |
| H4SA | 8048 | 10140 | 4809 | 156 |
| H4SB | 9392 | 10115 | 5410 | 156 |
| H4SC | 8899 | 11168 | 5424 | 156 |
